# Supplementary material for: Mimicking Elementary Reactions of Manganese Lipoxygenase Using Mn-hydroxo and Mn-alkylperoxo Complexes
Source: MDPI journal article supplement (doi:10.3390/molecules26237151), 2021-11-25
Supplement: s1 [file s1]

# Supplementary Materials for

## Mimicking Elementary Reactions of Manganese Lipoxygenase using Mn-hydroxo and Mn-alkylperoxo Complexes

Adedamola A. Opalade,<sup>a</sup> Elizabeth N. Grotemeyer,<sup>a</sup> and Timothy A. Jackson<sup>\*a</sup>

<sup>a</sup> *The University of Kansas, Department of Chemistry and Center for Environmentally Beneficial Catalysis, 1567 Irving Hill Road, Lawrence, KS 66045, USA.*

\*To whom correspondence should be addressed:

Timothy A. Jackson

Phone: (785) 864-3968

[taj@ku.edu](mailto:taj@ku.edu)

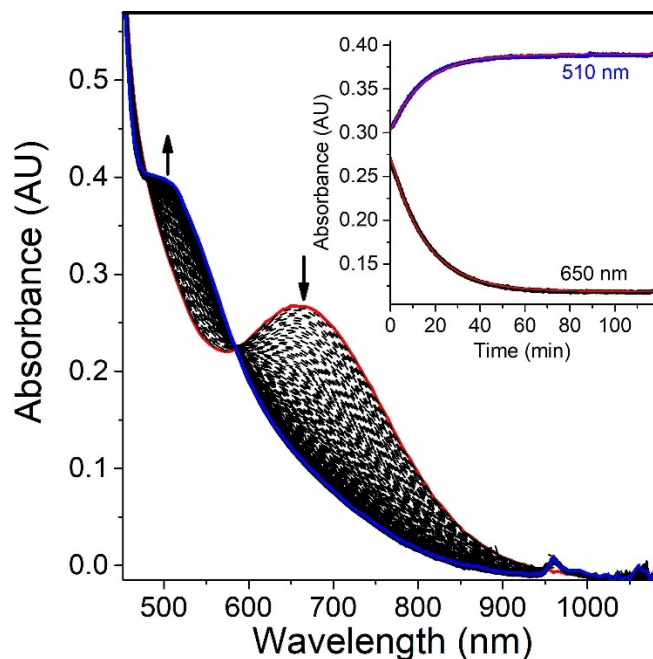

**Figure S1.** Electronic absorption spectra monitoring the reaction of anaerobic sample of 1.75 mM  $[\text{Mn}^{\text{III}}(\text{OO}'\text{Bu})(^6\text{Me}\text{dpaq})]^+$  in TFE (red trace) at 50 °C to form the  $[\text{Mn}^{\text{III}}(\text{OCH}_2\text{CF}_3)(^6\text{Me}\text{dpaq})]^+$  complex (blue trace). The inset shows the timecourse for spectral changes at 510 and 650 nm (blue and black dots, respectively) and fits to a first-order model (red traces).

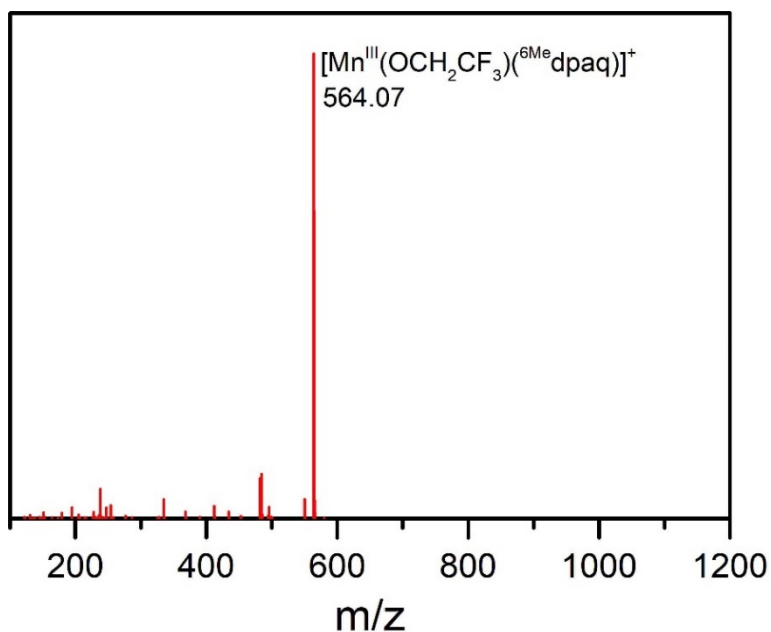

**Figure S2.** ESI-MS data for a  $2 \times 10^{-3}$  mM solution of  $[\text{Mn}^{\text{III}}(\text{OO}'\text{Bu})(^6\text{Me}\text{dpaq})]^+$  in TFE prepared under anaerobic conditions.

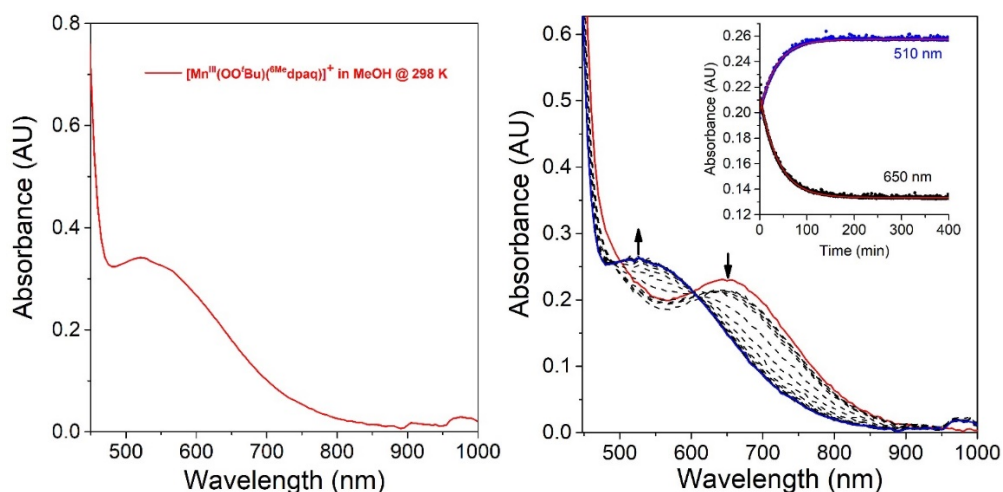

**Figure S3.** Left: Electronic absorption spectra of final reaction mixture from the dissolution of  $[\text{Mn}^{\text{III}}(\text{OO}'\text{Bu})(^6\text{Me}\text{dpaq})]^+$  in MeOH under anaerobic conditions at 25 °C. Right: Reaction of 1.0 mM solution of  $[\text{Mn}^{\text{III}}(\text{OO}'\text{Bu})(^6\text{Me}\text{dpaq})]^+$  in MeCN with 100  $\mu\text{L}$  MeOH under anaerobic conditions at 25 °C. The inset shows the timecourse for spectral changes at 510 and 650 nm (blue and black dots, respectively) and fits to a first-order model (red traces).

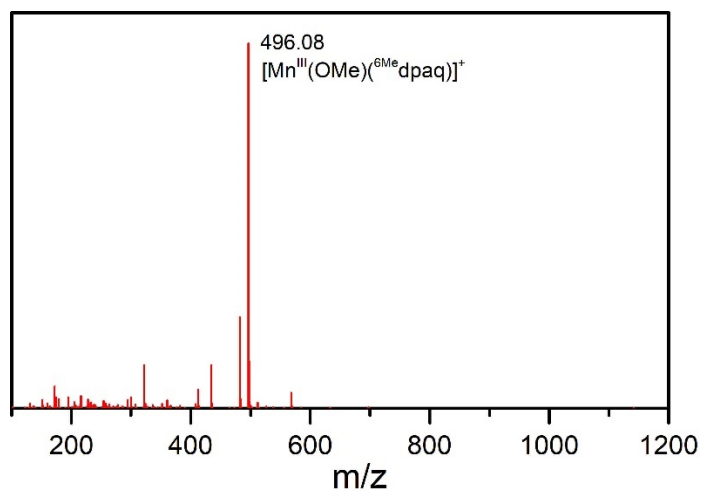

**Figure S4.** ESI-MS data for a  $2 \times 10^{-3}$  mM solution of  $[\text{Mn}^{\text{III}}(\text{OO}'\text{Bu})(^6\text{Me}\text{dpaq})](\text{OTf})$  prepared in MeOH under anaerobic conditions.

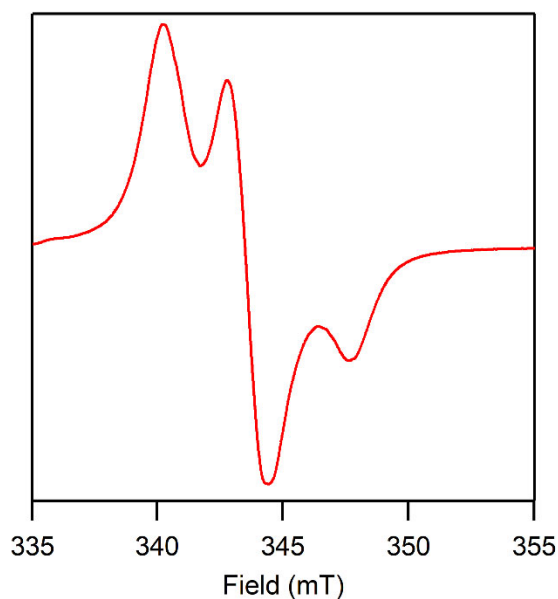

**Figure S5.** Perpendicular-mode EPR spectrum (8 K) of an MeCN solution following the reaction of 1.25 mM  $[\text{Mn}^{\text{III}}(\text{OH})(^6\text{Me}\text{dpaq})]^+$  with 100 equiv. TEMPOH. The intense signal from 340 - 350 mT is attributed to the TEMPO radical.

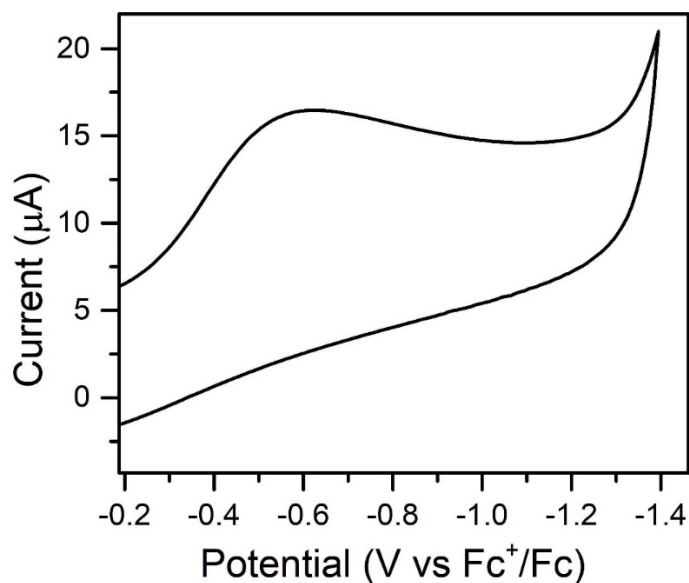

**Figure S6.** Cyclic voltammetry trace of  $[\text{Mn}^{\text{III}}(\text{OH})(^6\text{Me}\text{dpaq})]^+$  showing the  $\text{Mn}^{\text{III}}/\text{Mn}^{\text{II}}$  wave with a scan rate of  $100 \text{ mV s}^{-1}$ . The working electrode was a glassy carbon electrode with a Pt wire as the counter electrode. Ag/AgCl quasi-reference electrode was used, and  $\text{Fc}^+/\text{Fc}$  potential was measured as an external reference. 2 mM solutions of  $[\text{Mn}^{\text{III}}(\text{OH})(^6\text{Me}\text{dpaq})]^+$  prepared from 0.1 M  $\text{Bu}_4\text{NPF}_6$  electrolyte solution in  $\text{CH}_3\text{CN}$  were used for measurements at  $25^\circ\text{C}$ .

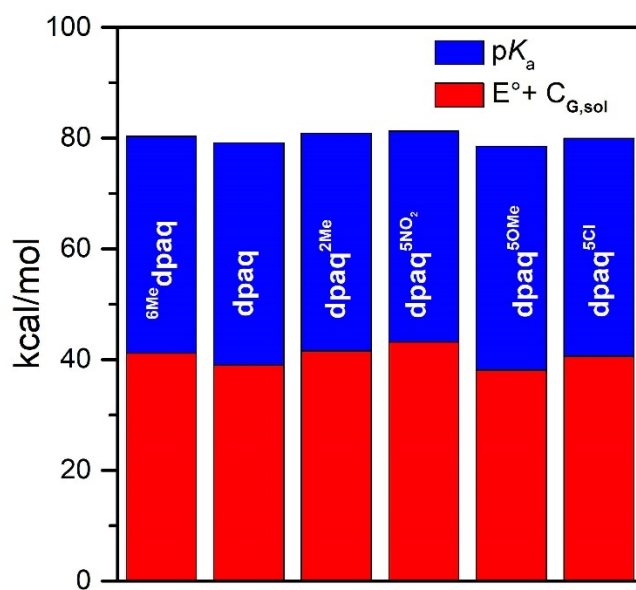

**Figure S7.** Thermodynamic contributions to the O–H BDFE of  $Mn^{II}$ -aqua complexes from the  $Mn^{III}$ -OH/ $Mn^{II}$ -OH reduction potentials and  $Mn^{II}$ -aqua  $pK_a$  values.

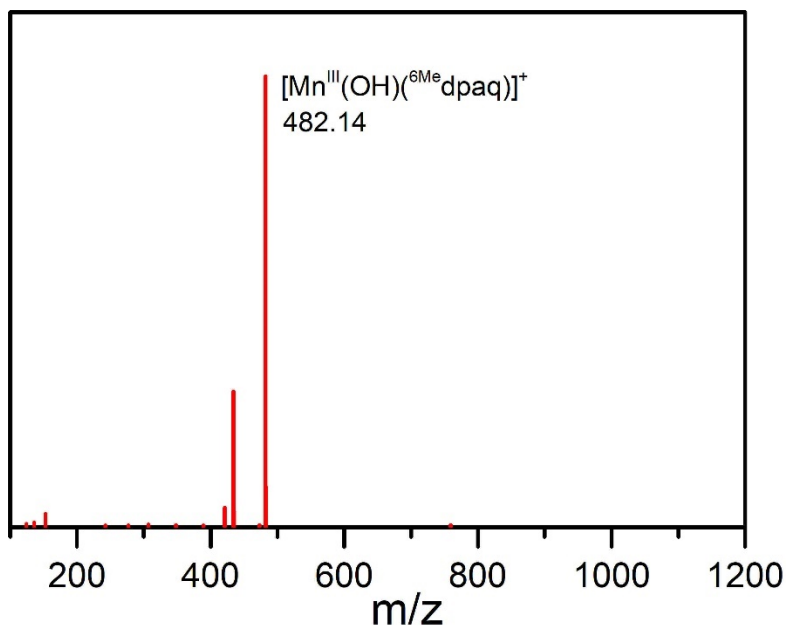

**Figure S8.** ESI-MS data for a  $2 \times 10^{-3}$  mM solution after the reaction of  $[Mn^{III}(OO^tBu)(^{6Me}dpaq)]^+$  with  $H_2O$  under anaerobic conditions at 25 °C.

**Table S1.** Calculated energies (eV) and contributions (%) of Mn 3*d*, O and N 2*p*-based spin-up MOs of [Mn<sup>III</sup>(OH)(dpaq)]<sup>+</sup> and [Mn<sup>III</sup>(OH)(<sup>6</sup>Me dpaq)]<sup>+</sup>.

|                      | MO  | Spin     | Occ. | Energy<br>(eV) | % Contribution |              |      |
|----------------------|-----|----------|------|----------------|----------------|--------------|------|
|                      |     |          |      |                | Mn 3 <i>d</i>  | N 2 <i>p</i> | OH   |
| dpaq                 | 114 | $\alpha$ | 1    | -7.3415        | 13.2           | 6.90         | 41   |
|                      | 115 | $\alpha$ | 1    | -7.3322        | 4.5            | 2.20         | 11.8 |
|                      | 116 | $\alpha$ | 1    | -6.9145        | 8.3            | 9.9          | 11.0 |
|                      | 117 | $\alpha$ | 1    | -6.0988        | 40.4           | 36.9         | 0.6  |
|                      | 118 | $\alpha$ | 1    | -5.9111        | 2.5            | 23.5         | 0.1  |
|                      | 119 | $\alpha$ | 0    | -2.3101        | 57.3           | 16.7         | 11.6 |
| <sup>6</sup> Me dpaq | 121 | $\alpha$ | 1    | -7.4285        | 14.3           | 3.3          | 42.7 |
|                      | 122 | $\alpha$ | 1    | -7.2994        | 1.2            | 1.4          | 0.6  |
|                      | 123 | $\alpha$ | 1    | -7.1537        | 0.0            | 0.0          | 0.0  |
|                      | 124 | $\alpha$ | 1    | -6.9890        | 5.6            | 6.3          | 10.4 |
|                      | 125 | $\alpha$ | 1    | -6.4543        | 37.0           | 14.7         | 2.0  |
|                      | 126 | $\alpha$ | 1    | -5.9682        | 2.9            | 23.5         | 0.2  |
|                      | 127 | $\alpha$ | 0    | -2.3528        | 54.3           | 12.0         | 9.6  |
|                      | 128 | $\alpha$ | 0    | -2.2140        | 2.8            | 16.6         | 0.4  |

**Table S2.** TD-DFT calculated energies, percent contributions from dominant one-electron excitations, and oscillator strengths for the major electronic transitions in  $[\text{Mn}^{\text{III}}(\text{OH})(\text{dpaq})]^+$  and  $[\text{Mn}^{\text{III}}(\text{OH})(^6\text{Mc}^{\text{dpaq}})]^+$ .

| Ligand               | State | Energy<br>( $\text{cm}^{-1}$ ) | $f_{\text{osc}}$ | Transition | %    | Donor MO (%)                                                             | Acceptor MO (%)                                                        | Comment           |
|----------------------|-------|--------------------------------|------------------|------------|------|--------------------------------------------------------------------------|------------------------------------------------------------------------|-------------------|
| dpaq                 | 1     | 13000<br>(770 nm)              | 0.00124          | 117a→119a  | 91.0 | Mn $3d_{x^2-y^2}$ (39.1)<br>N $p_x$ (19.9)<br>N $p_y$ (14.8)             | Mn $3d_z^2$ (51.5)<br>O $p_z$ (10.3)<br>N $p_x$ (6.2)<br>N $p_z$ (7.6) | <i>d-d</i> & LMCT |
|                      | 2     | 19800<br>(505 nm)              | 0.00113          | 118a→119a  | 81.5 | Mn $3d_{yz}$ (2.3)<br>O $p_y$ (9.6)<br>N $p_y$ (23.4)<br>C $p_y$ (54.7)  | Mn $3d_z^2$ (51.5)<br>O $p_z$ (10.3)<br>N $p_x$ (6.2)<br>N $p_z$ (7.6) | LMCT              |
|                      | 4     | 20600<br>(486 nm)              | 0.00238          | 114a→119a  | 38.9 | Mn $3d_{xz}$ (11.7)<br>O $p_x$ (43.4)<br>C $p_y$ (23.6)<br>N $p_x$ (5.2) | Mn $3d_z^2$ (51.5)<br>O $p_z$ (10.3)<br>N $p_x$ (6.2)<br>N $p_z$ (7.6) | LMCT & <i>d-d</i> |
|                      | —     |                                |                  | 116a→119a  | 29.3 | Mn $3d_{xz}$ (6.8)<br>O $p_x$ (53.3)<br>O $p_z$ (56.9)                   | Mn $3d_z^2$ (51.5)<br>O $p_z$ (10.3)<br>N $p_x$ (6.2)<br>N $p_z$ (7.6) | LMCT & <i>d-d</i> |
| <sup>6</sup> Mc dpaq | 1     | 15900<br>(630 nm)              | 0.00051          | 125a→127a  | 86.1 | Mn $3d_{x^2-y^2}$ (33.4)<br>N $p_x$ (16.4)<br>N $p_y$ (19.1)             | Mn $3d_z^2$ (45.8)<br>O $p_z$ (8.8)<br>N $p_x$ (6.2)<br>N $p_z$ (7.0)  | <i>d-d</i> & LMCT |
|                      | 3     | 20000<br>(498 nm)              | 0.00052          | 126a→127a  | 58.5 | Mn $3d_{yz}$ (2.4)<br>N $p_y$ (22.9)<br>O $p_y$ (9.4)<br>C $p_y$ (48.8)  | Mn $3d_z^2$ (45.8)<br>O $p_z$ (8.8)<br>N $p_x$ (6.2)<br>N $p_z$ (7.0)  | LMCT              |
|                      | —     |                                |                  | 126a→128a  | 15.7 | Mn $3d_{yz}$ (2.4)<br>N $p_y$ (22.9)<br>O $p_y$ (9.4)<br>C $p_y$ (48.8)  | N $p_y$ (15.3)<br>C $p_y$ (67.2)                                       | ILCT              |
|                      | 4     | 21300<br>(467 nm)              | 0.00345          | 120a→127a  | 10.1 | Mn $3d_{xz}$ (3.0)<br>O $p_x$ (12.2)<br>C $p_y$ (64.9)                   | Mn $3d_z^2$ (45.8)<br>O $p_z$ (8.8)<br>N $p_x$ (6.2)<br>N $p_z$ (7.0)  | LMCT & <i>d-d</i> |
|                      | —     |                                |                  | 121a→127a  | 43.1 | Mn $3d_{xz}$ (12.4)<br>O $p_x$ (52.3)<br>C $p_y$ (13.9)                  | Mn $3d_z^2$ (45.8)<br>O $p_z$ (8.8)<br>N $p_x$ (6.2)<br>N $p_z$ (7.0)  | LMCT & <i>d-d</i> |
|                      | —     |                                |                  | 124a→127a  | 27.0 | Mn $3d_{xz}$ (5.3)<br>O $p_x$ (53.1)<br>C $p_x$ (6.3)<br>C $p_z$ (8.5)   | Mn $3d_z^2$ (45.8)<br>O $p_z$ (8.8)<br>N $p_x$ (6.2)<br>N $p_z$ (7.0)  | LMCT & <i>d-d</i> |

## Calculation of Thermodynamic Parameters

The  $pK_a$  value, reduction potential, and BDFE of  $[\text{Mn}^{\text{III}}(\text{OH})(^6\text{Me}\text{dpaq})](\text{OTf})$  were determined following an approach we previously employed for  $\text{Mn}^{\text{III}}$ -hydroxo complexes.<sup>1</sup> This procedure is based on principles employed in the work of Solis and Hammes-Schiffer.<sup>2</sup> This technique relies on the use of a reference complex (similar to the complex of study), for which experimental  $pK_a$  and reduction potential values are known. We utilized the  $[\text{Mn}^{\text{III}}(\text{OH}_2)(\text{dpaq})]^{2+}$  complex as our reference, with  $pK_a = 6.8$  and  $E_{1/2} = 0.65$  (versus  $\text{Fc}^+/\text{Fc}$ ).<sup>3</sup> The calculated  $pK_a$  and  $E_{1/2}$  parameters were determined using the optimized structures of the  $[\text{Mn}^{\text{III}}(\text{OH})(^6\text{Me}\text{dpaq})]^+$ ,  $[\text{Mn}^{\text{II}}(\text{OH}_2)(^6\text{Me}\text{dpaq})]^+$ ,  $[\text{Mn}^{\text{II}}(\text{OH})(^6\text{Me}\text{dpaq})]$ , and  $[\text{Mn}^{\text{III}}(\text{OH}_2)(^6\text{Me}\text{dpaq})]^{2+}$  complexes. Single-point energy and analytical frequency calculations for these optimized structures provided the data for the determination of  $\Delta\Delta G$  for the proton- and electron-transfer reactions between the reference compound and the compound of interest (Table S1). These  $\Delta\Delta G$  values were then converted to  $pK_a$  and  $E_{1/2}$  values relative to the reference complex (Table S2). From these values, the BDFEs for the  $[\text{Mn}^{\text{II}}(\text{OH}_2)(^6\text{Me}\text{dpaq})]^+$  complexes was calculated using the Bordwell equation.<sup>4</sup>

**Table S3.** DFT-Calculated  $\Delta G$  values (in kcal/mol) for the addition of a proton or electron used in calculating the  $E_{\text{red}}$  and  $pK_a$  values.

| Ligand  | $\Delta G(\text{Mn}^{\text{III}}(\text{OH}_2) - \text{Mn}^{\text{III}}(\text{OH}))$ | $\Delta G(\text{Mn}^{\text{II}}(\text{OH}_2) - \text{Mn}^{\text{III}}(\text{OH}_2))$ | $\Delta G(\text{Mn}^{\text{II}}(\text{OH}) - \text{Mn}^{\text{III}}(\text{OH}))$ | $\Delta G(\text{Mn}^{\text{II}}(\text{OH}_2) - \text{Mn}^{\text{II}}(\text{OH}))$ |
|---------|-------------------------------------------------------------------------------------|--------------------------------------------------------------------------------------|----------------------------------------------------------------------------------|-----------------------------------------------------------------------------------|
| dpaq    | -266.7                                                                              | -109.4                                                                               | -79.9                                                                            | -296.2                                                                            |
| 6Medpaq | -266.4                                                                              | -110.7                                                                               | 81.9                                                                             | -295.2                                                                            |

**Table S4.** DFT-calculated thermodynamic parameters used to determine  $\text{Mn}^{\text{II}}\text{-OH}_2$  BDFEs for the  $[\text{Mn}^{\text{II}}(\text{OH}_2)(^6\text{Me}\text{dpaq})]^+$  complex.

| Ligand  | $pK_a(\text{Mn}^{\text{III}} - \text{OH}_2)$ | $E(\text{Mn}^{\text{III/II}} - \text{OH}_2)$ | $pK_a(\text{Mn}^{\text{II}} - \text{OH}_2)$ | $E(\text{Mn}^{\text{III/II}} - \text{OH})$ | BDFE |
|---------|----------------------------------------------|----------------------------------------------|---------------------------------------------|--------------------------------------------|------|
| dpaq    | 6.8                                          | 0.65                                         | 29.3                                        | -0.69                                      | 79.1 |
| 6Medpaq | 6.6                                          | 0.71                                         | 28.6                                        | -0.60                                      | 80.2 |



**Table S5.** Coordinates for the DFT optimized structure of  $[\text{Mn}^{\text{III}}(\text{OH})(\text{dpaq})]^+$ 

|    | x                 | y                 | z                 |
|----|-------------------|-------------------|-------------------|
| Mn | -0.14219165609036 | -0.07253586590930 | 0.03607249738240  |
| O  | 0.33122965488788  | -1.20168526217487 | -3.87229617381038 |
| O  | -0.19849237073471 | -0.09656943160246 | 1.86376611350255  |
| H  | -1.07143935588853 | -0.33399235757235 | 2.21202830594289  |
| N  | -0.74660079068655 | 1.90600332187026  | -0.25519170390517 |
| N  | -0.07367099098497 | 0.00971768662552  | -1.94109656174860 |
| N  | 0.49902570255718  | -2.16819791227168 | -0.33473525618378 |
| N  | -2.06154811810668 | -1.15962145752629 | -0.14399246017459 |
| N  | 2.06355247844104  | 0.04148873600204  | 0.09299462741103  |
| C  | -1.06408701816670 | 2.78969263609687  | 0.67596457829911  |
| H  | -0.99261608291609 | 2.45143625024986  | 1.71116599527579  |
| C  | -1.47216841924601 | 4.09853048131705  | 0.35111831754528  |
| H  | -1.72597014373794 | 4.79406615163105  | 1.15206916882673  |
| C  | -1.54174055117505 | 4.47116536795690  | -0.97690634644377 |
| H  | -1.85452554376855 | 5.47952343220576  | -1.25832033430262 |
| C  | -1.20424776960893 | 3.54132208662100  | -1.99516424640734 |
| C  | -1.24311008470694 | 3.83163626758326  | -3.38520008618476 |
| H  | -1.54824720293904 | 4.82628500693898  | -3.71687814518010 |
| C  | -0.89252791977610 | 2.84886212218416  | -4.28885452579482 |
| H  | -0.91842240184035 | 3.06452695568419  | -5.36003668391427 |
| C  | -0.49475060841919 | 1.55279287888408  | -3.87643593790228 |
| H  | -0.22682607705947 | 0.80480287910606  | -4.61709996040394 |
| C  | -0.44281153255795 | 1.22597258917500  | -2.52318705495967 |
| C  | -0.80329100964632 | 2.24044649886853  | -1.57993259489325 |
| C  | 0.28020121629306  | -1.09407405226742 | -2.64585501388067 |
| C  | 0.67223727140655  | -2.30805582891548 | -1.80363972798089 |
| H  | 1.72591941888893  | -2.52389155739413 | -2.03312696054286 |
| H  | 0.09713229013950  | -3.16913969218246 | -2.17349812585978 |
| C  | -0.57227892626038 | -3.03411677520719 | 0.19304539760490  |
| H  | -0.48654094066340 | -3.03999654152999 | 1.28967193297595  |
| H  | -0.46008249410669 | -4.07280213364442 | -0.15482043089258 |
| C  | -1.93488472520184 | -2.49544924835089 | -0.16775823889411 |
| C  | -3.02093342803376 | -3.31935302926983 | -0.46054247491006 |
| H  | -2.89041743724205 | -4.40249836019944 | -0.48746865872848 |
| C  | -4.26246282396130 | -2.73280048625363 | -0.71566194050750 |
| H  | -5.12830177209073 | -3.35675660327192 | -0.94754215356754 |
| C  | -4.37963123313547 | -1.34161386380974 | -0.67891486582871 |
| H  | -5.32960808468429 | -0.84273767826421 | -0.87656874705749 |
| C  | -3.24359145365833 | -0.58854096352645 | -0.39343982478705 |
| H  | -3.27680640627013 | 0.50260522246721  | -0.36586519396218 |
| C  | 1.76744457573486  | -2.33913153612788 | 0.40041595537648  |
| H  | 1.52620994391939  | -2.40327132821974 | 1.47153941338759  |
| H  | 2.27763772245356  | -3.27232813666299 | 0.11417501220687  |
| C  | 2.67220707288147  | -1.14965947041526 | 0.18954981062438  |
| C  | 4.06165480899833  | -1.25829745796042 | 0.13539694588957  |

|   |                  |                   |                   |
|---|------------------|-------------------|-------------------|
| H | 4.53374719135460 | -2.23991464637611 | 0.20317335641537  |
| C | 4.82298941239088 | -0.09668055245048 | -0.00828209839859 |
| H | 5.91276250232629 | -0.15502194972326 | -0.05488246915240 |
| C | 4.17398668232074 | 1.13664155004439  | -0.10080299045284 |
| H | 4.73052016322734 | 2.06759088355517  | -0.21903931884633 |
| C | 2.78253550324586 | 1.15798320779004  | -0.05030498303693 |
| H | 2.22523276189734 | 2.09380696622294  | -0.13046213917051 |

**Table S6.** Coordinates for the DFT optimized structure of  $[\text{Mn}^{\text{III}}(\text{OH})(^6\text{Me}\text{dpaq})]^+$

|    | x                 | y                 | z                 |
|----|-------------------|-------------------|-------------------|
| Mn | -0.02567476246197 | -0.04459169029074 | 0.09967676049221  |
| N  | -1.97658679169226 | 0.48071393361650  | -0.23448955959005 |
| N  | 0.04117646579237  | -2.37712738434784 | -0.05675372548970 |
| N  | 0.02390988620018  | 0.11438890384439  | -1.86119582667103 |
| O  | -0.10295208514034 | -0.14014504139624 | 1.92555675628101  |
| O  | 1.41441794024280  | 0.03561908219863  | -3.71112011905760 |
| N  | 2.04742738182688  | -0.49135744580290 | -0.13896635387216 |
| N  | 1.01768844183736  | 2.14142266563744  | 0.13868260506896  |
| C  | -2.92397189871559 | 0.62440534779709  | 0.67654105951924  |
| C  | -4.23523883992121 | 1.00259944981477  | 0.32868030342349  |
| C  | -4.54256881495845 | 1.23061730011237  | -0.99893059648529 |
| C  | -3.54265780553904 | 1.08109311560620  | -1.99568150066262 |
| C  | -3.75567916018994 | 1.29104295608044  | -3.38495310266915 |
| C  | -2.70567350462418 | 1.11424054593534  | -4.26402608975788 |
| C  | -1.41348520289158 | 0.72641062064980  | -3.82813637663359 |
| C  | -1.16500025012785 | 0.51039398236158  | -2.47587853854953 |
| C  | -2.24597735654061 | 0.69481025250400  | -1.55915386605533 |
| C  | 1.19773770827417  | -0.09746916013351 | -2.50712484192533 |
| C  | 2.31850662121106  | -0.60333084421137 | -1.60276354506757 |
| C  | 2.29740959911618  | -1.76817779948695 | 0.56853766688011  |
| C  | 1.29062458183852  | -2.81275710370378 | 0.16827099930169  |
| C  | 1.64033657156648  | -4.15813853068180 | 0.06833557474556  |
| C  | 0.64614676641376  | -5.07782871798268 | -0.26454970938781 |
| C  | -0.64881528145147 | -4.61849225712816 | -0.49497738454244 |
| C  | -0.92735863261562 | -3.24944186837841 | -0.39018018355329 |
| C  | 2.83836881995795  | 0.59430208467451  | 0.48442462258636  |
| C  | 2.34665812787011  | 1.95355609153614  | 0.06671528736203  |
| C  | 3.22529051670481  | 2.96499987118492  | -0.31215629781708 |
| C  | 2.69886822508009  | 4.22613460367792  | -0.60000751175311 |
| C  | 1.32586981251519  | 4.42391617862421  | -0.48915695331727 |
| C  | 0.49766011630384  | 3.35371336998579  | -0.11712982586957 |
| C  | -2.30381482939073 | -2.71541353373950 | -0.64951736217012 |
| C  | -0.98605839688791 | 3.53697463354196  | 0.00451003070375  |
| H  | 0.05444595818788  | 0.71848967417961  | 2.34749415167464  |
| H  | -2.63551178529413 | 0.43509053334714  | 1.71151516755635  |
| H  | -4.98514563438154 | 1.11017686656478  | 1.11331495860291  |
| H  | -5.55189999967400 | 1.52580708163302  | -1.29512895194754 |

|   |                   |                   |                   |
|---|-------------------|-------------------|-------------------|
| H | -4.74617983923081 | 1.58762921721358  | -3.73565238115250 |
| H | -2.86403130662675 | 1.27315269359910  | -5.33350761850459 |
| H | -0.61076427870865 | 0.59341290280540  | -4.54857562759415 |
| H | 2.47225325537963  | -1.66056252638514 | -1.86102423209632 |
| H | 3.24873896676434  | -0.07833230745454 | -1.86023117213415 |
| H | 2.19745512028514  | -1.57055201437627 | 1.64537478162750  |
| H | 3.32282179934135  | -2.12052523816664 | 0.38017206782263  |
| H | 2.67062091819616  | -4.47026187399267 | 0.24631850300523  |
| H | 0.88086836635426  | -6.14109012147116 | -0.35205554717658 |
| H | -1.44878621760418 | -5.30973237973225 | -0.76443458164830 |
| H | 3.90612557057667  | 0.47262405107894  | 0.24913414724098  |
| H | 2.72045444206872  | 0.50100814834383  | 1.57343441457034  |
| H | 4.29644098981026  | 2.76661879715429  | -0.37291003826189 |
| H | 3.35502433537005  | 5.04557203081868  | -0.90187347443179 |
| H | 0.88223444582665  | 5.40032428720937  | -0.69037907683012 |
| H | -2.69053548308173 | -2.18316718667333 | 0.23177823394038  |
| H | -2.99966873299650 | -3.52786891719292 | -0.89600164349648 |
| H | -2.29412645171946 | -2.00735250810862 | -1.49104296665313 |
| H | -1.50211199433299 | 3.13418306550476  | -0.88023976541721 |
| H | -1.24250118117270 | 4.60238579830533  | 0.07813151763140  |
| H | -1.37688723294067 | 3.01699831369557  | 0.88909673820561  |
| O | 10.58863310015237 | 5.15652843088464  | 10.60319538910858 |

**Table S7.** Coordinates for the DFT optimized structure of  $[\text{Mn}^{\text{III}}(\text{OH}_2)(^6\text{Me dpaq})]^{2+}$

|    | x                 | y                 | z                 |
|----|-------------------|-------------------|-------------------|
| Mn | 0.01905221089840  | -0.06571896570329 | -0.04390103523411 |
| N  | -1.90543687505187 | 0.46032219491222  | -0.35119327308200 |
| N  | 0.02301385132093  | -2.35994599040243 | 0.03469327251355  |
| N  | 0.09986073694361  | 0.11886427718180  | -1.94819680981538 |
| O  | -0.10960119647736 | -0.10046076716661 | 1.97757812265429  |
| O  | 1.51640923880734  | 0.07699727380871  | -3.76856656012384 |
| N  | 2.05658733117237  | -0.51788097756336 | -0.21355266665805 |
| N  | 0.960974444498162 | 2.08585692695214  | 0.19955046501092  |
| C  | -2.86362543024227 | 0.58546003687148  | 0.55662522476488  |
| C  | -4.16315633022645 | 0.98918021687070  | 0.20554542164452  |
| C  | -4.45423030512674 | 1.26694923645663  | -1.11783039250579 |
| C  | -3.44621555950808 | 1.14099606408393  | -2.10756855278146 |
| C  | -3.63422553276726 | 1.40286738279714  | -3.49165886358498 |
| C  | -2.57423596058772 | 1.24522503955473  | -4.36139907646225 |
| C  | -1.29249755194070 | 0.82532940023660  | -3.92177548225852 |
| C  | -1.07624337561538 | 0.55956332152775  | -2.57578765869113 |
| C  | -2.16055029439843 | 0.72402693182999  | -1.67179639827532 |
| C  | 1.29357525404584  | -0.10399807362547 | -2.58097209613010 |
| C  | 2.35411095615065  | -0.69340231757978 | -1.66771883835359 |
| C  | 2.30993622937769  | -1.77312751088922 | 0.54473318054682  |
| C  | 1.28050182070924  | -2.81261967292524 | 0.20339148616312  |
| C  | 1.61153009666001  | -4.15877287636816 | 0.09564981031047  |

|   |                   |                   |                   |
|---|-------------------|-------------------|-------------------|
| C | 0.59279324353295  | -5.06933024591417 | -0.18725650302599 |
| C | -0.70531092204058 | -4.59741037372563 | -0.36040113812729 |
| C | -0.97011406141887 | -3.22648968041608 | -0.25075602521090 |
| C | 2.84468884378269  | 0.60004029587419  | 0.37588482205409  |
| C | 2.28531486571709  | 1.93847760016633  | -0.01091148709077 |
| C | 3.08852271293045  | 2.96750220666052  | -0.48490919783342 |
| C | 2.49544007211825  | 4.21052787959338  | -0.72527541519589 |
| C | 1.14013332038155  | 4.37203721381379  | -0.46223299396439 |
| C | 0.38392470815800  | 3.28519338809991  | 0.00463479553688  |
| C | -2.35443782068590 | -2.69224848893504 | -0.45362632120742 |
| C | -1.07654591016836 | 3.44657560084905  | 0.30183830313007  |
| H | 0.20482844249446  | 0.63691073738748  | 2.53554873139540  |
| H | -2.60243403657797 | 0.36643335192787  | 1.59228888173554  |
| H | -4.91854094471118 | 1.07892907877016  | 0.98659218222664  |
| H | -5.45689712226040 | 1.58452133330122  | -1.41243231083487 |
| H | -4.61514493949178 | 1.72535762660264  | -3.84556224269470 |
| H | -2.71341568073531 | 1.44512656755352  | -5.42617834450195 |
| H | -0.48261937208478 | 0.70932811438638  | -4.63667797461669 |
| H | 2.39926067600902  | -1.76738158210730 | -1.89652922096446 |
| H | 3.33707510295962  | -0.26924619432963 | -1.90979877290264 |
| H | 2.25559714412567  | -1.53493188800410 | 1.61652787514009  |
| H | 3.32701537718253  | -2.13529061380452 | 0.33938375272860  |
| H | 2.64563333288398  | -4.47940970104758 | 0.22804001471516  |
| H | 0.81220617433540  | -6.13505014139410 | -0.28099529906683 |
| H | -1.52320705545054 | -5.28132293123752 | -0.59058872897515 |
| H | 3.89898566627230  | 0.50207351764696  | 0.08497220905028  |
| H | 2.78838432242641  | 0.50193712759534  | 1.46885706529982  |
| H | 4.15320577894661  | 2.80059676808245  | -0.65304200394901 |
| H | 3.09086157744228  | 5.04466975972934  | -1.10239254445936 |
| H | 0.65129037692180  | 5.33560631384962  | -0.61338522297117 |
| H | -2.69984178401651 | -2.14466287529752 | 0.43482337602732  |
| H | -3.06078943430370 | -3.50915219211310 | -0.64763373720013 |
| H | -2.38743246848147 | -2.00677525114875 | -1.31320453919100 |
| H | -1.68913073878862 | 3.15997242941179  | -0.56699072361551 |
| H | -1.30787251918667 | 4.49699937387504  | 0.52454812920924  |
| H | -1.37788101231032 | 2.83222325574168  | 1.15945762606172  |
| H | -0.15220681003347 | -0.90819134730390 | 2.52151500363678  |

**Table S8.** Coordinates for the DFT optimized structure of  $[\text{Mn}^{\text{II}}(\text{OH})(^6\text{Me dpaq})]$

|    | x                 | y                 | z                 |
|----|-------------------|-------------------|-------------------|
| Mn | -0.14453527641658 | -0.21809867116731 | 0.33083530573059  |
| N  | -2.18640315758702 | 0.45611099652977  | -0.34604530582938 |
| N  | 0.17511498039014  | -2.53677386733417 | 0.12303321329971  |
| N  | 0.01504047582641  | 0.16438358190920  | -1.85208840772466 |
| O  | -0.39111886265709 | -0.25673592007281 | 2.29855478597502  |
| O  | 1.52343296559108  | 0.26886092195927  | -3.63011068954887 |

|   |                   |                   |                   |
|---|-------------------|-------------------|-------------------|
| N | 2.12251111100167  | -0.58581941009260 | -0.14729017547205 |
| N | 0.99063436038475  | 2.08349653157401  | 0.32483430689659  |
| C | -3.22253572090189 | 0.57888260037317  | 0.45922351725368  |
| C | -4.45302654919837 | 1.12609787646094  | 0.03584451030318  |
| C | -4.57100603060795 | 1.55218998005115  | -1.27092040259701 |
| C | -3.46862462588083 | 1.43516297249835  | -2.15962339074966 |
| C | -3.51463324394159 | 1.86286195431683  | -3.51346536574560 |
| C | -2.38799993566638 | 1.72028835092733  | -4.29899858722373 |
| C | -1.18918341896715 | 1.16372650746433  | -3.79618667042738 |
| C | -1.08481149002035 | 0.72338402356329  | -2.47063894963060 |
| C | -2.26370753162490 | 0.86549008588611  | -1.64073856310881 |
| C | 1.19860305312467  | -0.00677550326816 | -2.45984510795986 |
| C | 2.25857600991614  | -0.72184321779031 | -1.60672798989620 |
| C | 2.45465794665088  | -1.82232454172702 | 0.56946021995645  |
| C | 1.45530932608231  | -2.91370481910806 | 0.26156759932486  |
| C | 1.84785683843290  | -4.24798267423000 | 0.14008473939286  |
| C | 0.87192241167201  | -5.20937597081777 | -0.12401022931784 |
| C | -0.45496908365570 | -4.80655148792737 | -0.26867935258450 |
| C | -0.77517335748016 | -3.44847102819169 | -0.14263963580456 |
| C | 2.87035114184523  | 0.56754097145170  | 0.37422524858223  |
| C | 2.25691452533762  | 1.87157939613578  | -0.07551884808670 |
| C | 2.95563316297708  | 2.79342250773102  | -0.85126173665054 |
| C | 2.31137053233895  | 3.98087151597972  | -1.21576818404282 |
| C | 1.00922583756835  | 4.20177751301298  | -0.78119004135263 |
| C | 0.36964589152627  | 3.22324254905356  | 0.00063257787792  |
| C | -2.17896821085509 | -2.94463124974748 | -0.30574818305647 |
| C | -1.03512545497397 | 3.42748010812856  | 0.49416286755490  |
| H | -0.24962447959370 | 0.61002450871254  | 2.69789677520038  |
| H | -3.07386830752992 | 0.24020901489475  | 1.48817335115822  |
| H | -5.28269973837482 | 1.20856384007592  | 0.74042390876463  |
| H | -5.50526592542264 | 1.98573756283493  | -1.63742841856074 |
| H | -4.43564853654990 | 2.29794372581576  | -3.90852963767037 |
| H | -2.41215193029157 | 2.04697944374691  | -5.34262310935231 |
| H | -0.31902583637451 | 1.07117363649805  | -4.44042807402450 |
| H | 2.17622852781139  | -1.78726056554148 | -1.86939901428450 |
| H | 3.25487758953495  | -0.39227880995120 | -1.94588852759769 |
| H | 2.41245392434006  | -1.60303365340666 | 1.64796366601588  |
| H | 3.47730534585455  | -2.17503795663472 | 0.34434108493839  |
| H | 2.89964758278432  | -4.52038918917312 | 0.24445222291521  |
| H | 1.14521226048049  | -6.26231024136035 | -0.22686208645267 |
| H | -1.24140436855516 | -5.53122897340620 | -0.48665001044225 |
| H | 3.93333040578182  | 0.52374639822630  | 0.07647335207905  |
| H | 2.82305941419478  | 0.52404203198143  | 1.47192693460885  |
| H | 3.98009124428446  | 2.58514410824562  | -1.16471916430378 |
| H | 2.82582381938736  | 4.72487114816642  | -1.82899420870968 |
| H | 0.47988564331657  | 5.12212985645315  | -1.03707198436248 |
| H | -2.50807727125867 | -2.41361030346307 | 0.60073581696996  |
| H | -2.87987050640727 | -3.76620328223198 | -0.50565731032080 |

|   |                   |                   |                   |
|---|-------------------|-------------------|-------------------|
| H | -2.23439750753533 | -2.22675860431316 | -1.13862575561044 |
| H | -1.75921574200334 | 3.29500927450546  | -0.32556803666326 |
| H | -1.16959889621565 | 4.44924251288694  | 0.88183633806399  |
| H | -1.27612733188964 | 2.70664393290545  | 1.28504881230294  |

**Table S9.** Coordinates for the DFT optimized structure of  $[\text{Mn}^{\text{II}}(\text{OH}_2)(^6\text{Me dpaq})]^+$

|    | x                 | y                 | z                 |
|----|-------------------|-------------------|-------------------|
| Mn | -0.08661871644147 | -0.21508642637688 | 0.04734994738621  |
| N  | -2.11212767884189 | 0.45037198880849  | -0.54063779190015 |
| N  | 0.14962414805521  | -2.47770646703602 | 0.22435505895942  |
| N  | 0.08888994846283  | 0.15100749797552  | -2.05419806464004 |
| O  | -0.39420044915458 | -0.15370462696922 | 2.26618661362503  |
| O  | 1.65199213094165  | 0.31967265715080  | -3.77523208164309 |
| N  | 2.15094743621471  | -0.61038855656012 | -0.30682126431120 |
| N  | 0.93064107065611  | 1.95054265430664  | 0.33362690470620  |
| C  | -3.16473721775327 | 0.55755712307160  | 0.24997454716490  |
| C  | -4.39095010523096 | 1.10135875045559  | -0.18146871433807 |
| C  | -4.49436717516686 | 1.54640352060032  | -1.48306011434974 |
| C  | -3.38168871580288 | 1.44521714092376  | -2.35900621585943 |
| C  | -3.41838581523354 | 1.88688557487328  | -3.70857488624917 |
| C  | -2.28902665214431 | 1.75420952933949  | -4.49050774377346 |
| C  | -1.09432282676681 | 1.18980225429836  | -3.98592816704111 |
| C  | -1.00388633857848 | 0.73559082604377  | -2.66725265464412 |
| C  | -2.17993362096779 | 0.87329752175337  | -1.83747306373235 |
| C  | 1.29162731204479  | -0.00895376678268 | -2.63462362077018 |
| C  | 2.29579857657277  | -0.78333714942478 | -1.76754112566622 |
| C  | 2.48998987259291  | -1.83742745266491 | 0.42878187635607  |
| C  | 1.42953430868659  | -2.89559621509961 | 0.24325772994169  |
| C  | 1.76616972969204  | -4.24381562804048 | 0.13652153960051  |
| C  | 0.74122404927956  | -5.18335226816243 | 0.02413757605252  |
| C  | -0.58066439670238 | -4.74393548230782 | 0.01786808829855  |
| C  | -0.85078605775865 | -3.37399387012779 | 0.11593495997706  |
| C  | 2.90322088943428  | 0.55550220803138  | 0.18708236156637  |
| C  | 2.19898788354105  | 1.85371665811193  | -0.11784324606035 |
| C  | 2.83400081796512  | 2.89877237738457  | -0.77943887674928 |
| C  | 2.13329515150347  | 4.09538689873367  | -0.96423241423741 |
| C  | 0.84443011284914  | 4.20490085179189  | -0.45725628788644 |
| C  | 0.26284374386583  | 3.10671956281892  | 0.19894872151367  |
| C  | -2.25416382332997 | -2.84828415160039 | 0.09642524935665  |
| C  | -1.12059178944423 | 3.21351730033233  | 0.77226387608054  |
| H  | 0.13088584714660  | 0.51617244826952  | 2.73636520423909  |
| H  | -3.04485340657330 | 0.21143540667783  | 1.27915950263475  |
| H  | -5.22810382796676 | 1.16769978722387  | 0.51511941327176  |
| H  | -5.42600363438968 | 1.98037240189840  | -1.85480673219642 |
| H  | -4.33822495904265 | 2.32393077397079  | -4.10337274000113 |
| H  | -2.30749488375242 | 2.09124768659602  | -5.53046070842150 |
| H  | -0.22088341805881 | 1.09928330233865  | -4.62647121043878 |

|   |                   |                   |                   |
|---|-------------------|-------------------|-------------------|
| H | 2.13869466175621  | -1.84583326929581 | -2.00745366183261 |
| H | 3.31694170696962  | -0.52744237060529 | -2.09198832970856 |
| H | 2.54388139602821  | -1.58532464927408 | 1.49926227429784  |
| H | 3.47779101911773  | -2.23390389838892 | 0.13978521020361  |
| H | 2.81508668335430  | -4.54432403733434 | 0.14083491872210  |
| H | 0.97221856088501  | -6.24755219848853 | -0.06248329890819 |
| H | -1.40722450624402 | -5.45065782333966 | -0.06957430608189 |
| H | 3.92837261451390  | 0.57026322208603  | -0.21803481320429 |
| H | 2.97834785276226  | 0.46540295599665  | 1.28053317384160  |
| H | 3.85645605922132  | 2.77812753154451  | -1.14056609272432 |
| H | 2.59735401074661  | 4.93406814270978  | -1.48837592110530 |
| H | 0.27670542351963  | 5.13168744591380  | -0.55948035126595 |
| H | -2.44463159302794 | -2.20811626514325 | 0.97117835973276  |
| H | -2.98505265865250 | -3.66724660034206 | 0.10447258359156  |
| H | -2.42964494714168 | -2.24106774073584 | -0.80499676717797 |
| H | -1.88066240688170 | 3.18747082056067  | -0.02412635294262 |
| H | -1.24179637492487 | 4.17249379215143  | 1.29881588969121  |
| H | -1.32596171602652 | 2.39876862325393  | 1.47648505489285  |
| H | -0.29682444237854 | -0.97551880989668 | 2.77927586215692  |

## References

1. Rice, D. B.; Munasinghe, A.; Grotemeyer, E. N.; Burr, A. D.; Day, V. W.; Jackson, T. A., Structure and Reactivity of ( $\mu$ -Oxo)dimanganese(III,III) and Mononuclear Hydroxomanganese(III) Adducts Supported by Derivatives of an Amide-Containing Pentadentate Ligand. *Inorganic Chemistry* **2019**, 58 (1), 622-636.
2. Solis, B. H.; Hammes-Schiffer, S., Proton-Coupled Electron Transfer in Molecular Electrocatalysis: Theoretical Methods and Design Principles. *Inorganic Chemistry* **2014**, 53 (13), 6427-6443.
3. Sankaralingam, M.; Lee, Y.-M.; Karmalkar, D. G.; Nam, W.; Fukuzumi, S., A Mononuclear Non-heme Manganese(III)–Aqua Complex as a New Active Oxidant in Hydrogen Atom Transfer Reactions. *Journal of the American Chemical Society* **2018**, 140 (40), 12695-12699.
4. Bordwell, F. G.; Cheng, J.; Ji, G. Z.; Satish, A. V.; Zhang, X., Bond dissociation energies in DMSO related to the gas phase values. *Journal of the American Chemical Society* **1991**, 113 (26), 9790-9795.
